# Supplementary material
Source: publisher site journal article supplement (https://www.dovepress.com/article/255921)
Supplement: Supplementary file 1 [file get_supplementary_file.php]

**[[Supplementary Tables & Figures]]**

**Supplementary Table 1. Input data for each analgesic and placebo for each of the 17 criteria included in the model**

| **Criterion** | **Scale Type** | **Acetaminophen** | **Parecoxib** | **Metamizole** | **Nefopam** | **Ketorolac** | **Tramadol** | **Morphine** | **Diclofenac** | **Placebo** |
| --- | --- | --- | --- | --- | --- | --- | --- | --- | --- | --- |
| **Efficacy** |  |  |  |  |  |  |  |  |  |  |
| Pain relief | Preference | 35 | 100 | 80 | 35 | 90 | 20 | 90 | 90 | 0 |
| Duration of action | Data* | 3.00 | 6.25 | 3.00 | 3.00 | 6.10 | 6.09 | 4.22 | 6.78 | 0.92 |
| Opioid sparing | Data† | 10.5 | 13.5 | 7.7 | 10.4 | 12.9 | 7.4 | 0 | 12.9 | 0 |
| **Safety** |  |  |  |  |  |  |  |  |  |  |
| **AEs** |  |  |  |  |  |  |  |  |  |  |
| Itchiness | Preference | 100 | 100 | 70 | 70 | 100 | 70 | 0 | 100 | 100 |
| Nausea/vomiting | Preference | 100 | 100 | 100 | 100 | 100 | 0 | 30 | 100 | 100 |
| Increased creatinine | Preference | 100 | 90 | 100 | 100 | 0 | 100 | 100 | 10 | 100 |
| Hepatic effects | Preference | 0 | 100 | 100 | 100 | 70 | 100 | 100 | 50 | 100 |
| Hypotension | Preference | 80 | 90 | 0 | 80 | 90 | 80 | 70 | 90 | 100 |
| Psychomimetic effects | Preference | 100 | 100 | 100 | 90 | 100 | 0 | 50 | 100 | 100 |
| **SAEs** |  |  |  |  |  |  |  |  |  |  |
| Cardiac effects | Preference | 100 | 50 | 100 | 100 | 50 | 100 | 100 | 0 | 100 |
| Respiratory depression | Preference | 100 | 100 | 100 | 100 | 100 | 70 | 0 | 100 | 100 |
| Renal impairment | Preference | 100 | 90 | 100 | 100 | 0 | 100 | 100 | 70 | 100 |
| GI effects | Preference | 90 | 80 | 90 | 100 | 0 | 100 | 100 | 25 | 100 |
| Agranulocytosis | Preference | 95 | 100 | 0 | 100 | 100 | 100 | 100 | 90 | 100 |
| Liver dysfunction | Preference | 0 | 100 | 100 | 100 | 100 | 100 | 100 | 80 | 100 |
| Anaphylaxis | Preference | 90 | 0 | 50 | 90 | 0 | 90 | 90 | 0 | 100 |
| Overdose toxicity | Preference | 50 | 90 | 100 | 80 | 70 | 50 | 0 | 70 | 100 |

*Based on median time to rescue medication.

†Based on median reduction of morphine consumption (in mg) over 24 hours.

For the criteria Duration of Action and Opioid Sparing, values are based on empirical measures from available clinical data. For the remaining criteria, each was scored from 0 to 100, with 100 awarded to the drug that scored best and 0 to the drug that scored worst. The remaining drugs were then scored from 0 to 100 according to their standing with each other.

**Abbreviations:** AEs, adverse events; GI, gastrointestinal; SAEs, serious adverse events.

**Supplementary Figure 1** Relative weighting of the data


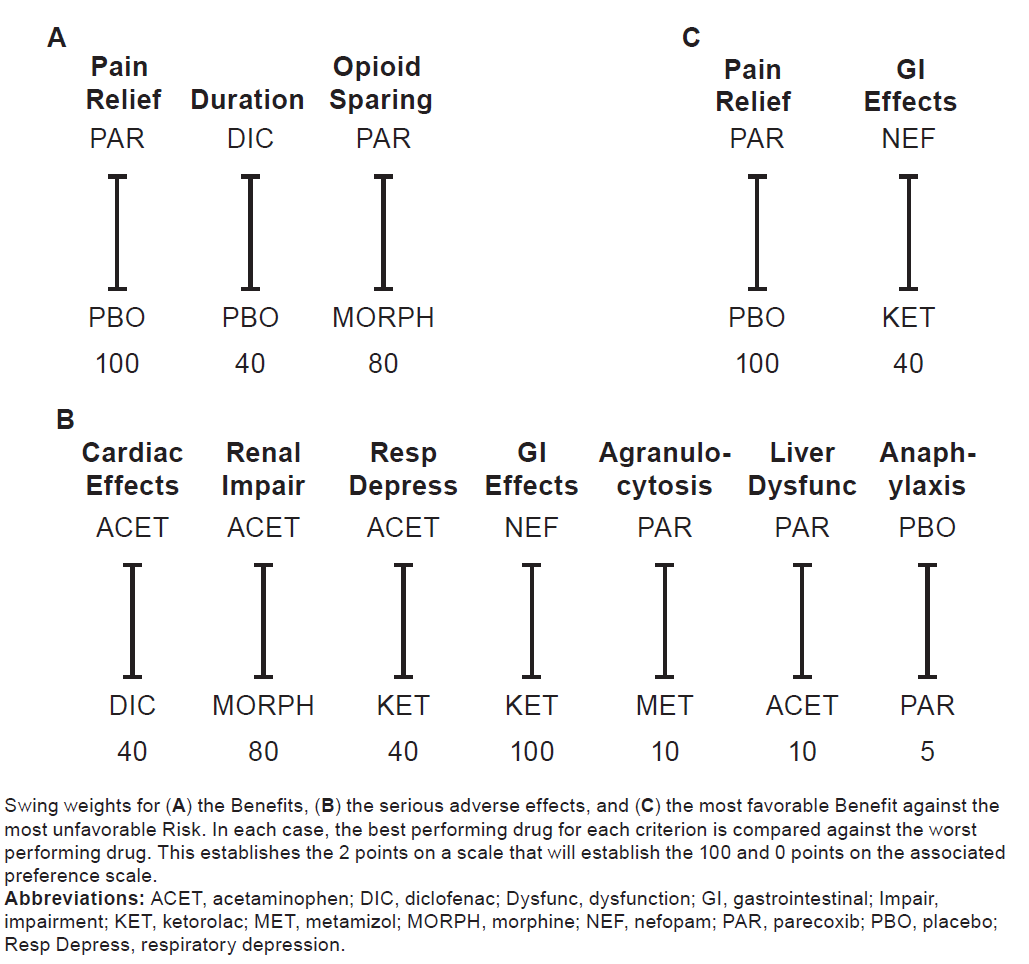


**Supplementary Figure 2** Impact of changes in the weight of total safety on overall efficacy-safety profiles

**Supplementary Figure 3** Impact of changes in the cumulative weight of pain relief on overall efficacy-safety profiles
